# Supplementary material for: DNA Methylation in Healthy Older Adults With a History of Childhood Adversity—Findings From the Women 40+ Healthy Aging Study
Source: PubMed Central journal article supplement (PMC6819958; doi:10.3389/fpsyt.2019.00777), 2019-10-23
Supplement: Table_1.pdf [file Table_1.pdf]

## Supplement

**Supplement table 1.**

Comparison between women with vs. without any lifetime psychiatric disorders with respect to early life adversity sub-types and methylation levels in the *NR3C1* promoter and the *ERα* shore.

|                                   | <b>With lifetime psychiatric disorder</b> | <b>Without lifetime psychiatric disorder</b> | <b>U</b> | <b>Z</b> | <b>p</b> |
|-----------------------------------|-------------------------------------------|----------------------------------------------|----------|----------|----------|
| <i>Emotional abuse</i>            |                                           |                                              | 383.00   | -1.272   | .204     |
| Mean rank                         | 68.20                                     | 54.79                                        |          |          |          |
| Sum of rank                       | 682.00                                    | 5534.00                                      |          |          |          |
| <i>Physical abuse</i>             |                                           |                                              | 545.00   | -.375    | .708     |
| Mean rank                         | 55.55                                     | 58.81                                        |          |          |          |
| Sum of rank                       | 611.00                                    | 6175.00                                      |          |          |          |
| <i>Sexual abuse</i>               |                                           |                                              | 505.50   | -1.161   | .428     |
| Mean rank                         | 51.95                                     | 58.64                                        |          |          |          |
| Sum of rank                       | 571.50                                    | 6098.00                                      |          |          |          |
| <i>Emotional neglect</i>          |                                           |                                              | 438.00   | -1.161   | .246     |
| Mean rank                         | 67.18                                     | 55.34                                        |          |          |          |
| Sum of rank                       | 739.00                                    | 5589.00                                      |          |          |          |
| <i>Physical neglect</i>           |                                           |                                              | 389.50   | -1.601   | .109     |
| Mean rank                         | 41.41                                     | 57.07                                        |          |          |          |
| Sum of rank                       | 455.50                                    | 5649.50                                      |          |          |          |
| <i>Maltreatment score</i>         |                                           |                                              | 426.00   | .696     | .696     |
| Mean rank                         | 54.90                                     | 51.13                                        |          |          |          |
| Sum of rank                       | 549.00                                    | 4704.00                                      |          |          |          |
| <i>NR3C1 promoter methylation</i> |                                           |                                              | 442.00   | -.353    | .724     |
| Mean rank                         | 46.18                                     | 49.36                                        |          |          |          |
| Sum of rank                       | 508.00                                    | 4245.00                                      |          |          |          |
| <i>ERα shore methylation</i>      |                                           |                                              | 504.00   | .549     | .549     |
| Mean rank                         | 63.18                                     | 56.89                                        |          |          |          |
| Sum of rank                       | 695.00                                    | 5860.00                                      |          |          |          |

Note. Grouping variable is lifetime psychiatric disease. \*p < 0.05 uncorrected for multiple comparison; \*\*p < 0.01, uncorrected for multiple comparison.

**Supplement table 2.**

Correlation analyses of single CpGs in the *NR3C1* promoter region and the maltreatment score.

|              | <b>Maltreatment score</b> |             |
|--------------|---------------------------|-------------|
| <b>Site</b>  | <b>r</b>                  | <b>p</b>    |
| CpG1         | <b>.181*</b>              | <b>.043</b> |
| CpG2         | <b>.227*</b>              | <b>.015</b> |
| CpG3         | .172                      | .051        |
| CpG4         | -.121                     | .127        |
| CpG5         | -.063                     | .278        |
| CpG6         | -.114                     | .142        |
| CpG7         | -.007                     | .474        |
| CpG8         | .021                      | .421        |
| CpG9         | -.141                     | .091        |
| CpG10        | -.141                     | .091        |
| CpG11        | -.148                     | .080        |
| CpG12        | -.144                     | .087        |
| CpG13        | -.155                     | .072        |
| CpG14        | -.133                     | .104        |
| CpG15        | -.144                     | .086        |
| CpG16        | -.145                     | .086        |
| CpG17        | -.118                     | .132        |
| CpG18        | -.142                     | .090        |
| <b>CpG19</b> | <b>-.204*</b>             | <b>.026</b> |
| CpG20        | -.140                     | .093        |
| CpG21        | -.139                     | .094        |
| CpG22        | -.139                     | .094        |
| CpG23        | -.135                     | .100        |
| <b>CpG24</b> | <b>-.182*</b>             | <b>.043</b> |
| CpG25        | -.143                     | .088        |
| CpG26        | -.135                     | .101        |
| CpG27        | -.119                     | .130        |
| CpG28        | -.116                     | .136        |
| CpG29        | -.145                     | .086        |
| CpG30        | -.141                     | .091        |
| CpG31        | -.136                     | .100        |

|       |       |      |
|-------|-------|------|
| CpG32 | -.092 | .193 |
| CpG33 | -.103 | .166 |
| CpG34 | -.080 | .225 |
| CpG35 | -.102 | .169 |
| CpG36 | -.049 | .322 |
| CpG37 | .126  | .117 |
| CpG38 | -.104 | .164 |
| CpG39 | -.054 | .307 |

Note. \* $p < 0.05$  uncorrected for multiple comparison; \*\* $p < 0.01$ , uncorrected for multiple comparison.

### Supplement table 3.

Correlation analyses of single CpGs in the *ERα* shore and the maltreatment score.

| Site | Maltreatment score |             |
|------|--------------------|-------------|
|      | r                  | p           |
| CpG1 | <b>.215*</b>       | <b>.017</b> |
| CpG2 | .141               | .085        |
| CpG3 | .084               | .205        |
| CpG4 | .098               | .170        |
| CpG5 | .167               | .051        |
| CpG6 | .092               | .186        |
| CpG7 | .165               | .054        |
| CpG8 | .106               | .151        |
| CpG9 | .049               | .318        |

Note. \* $p < 0.05$  uncorrected for multiple comparison; \*\* $p < 0.01$ , uncorrected for multiple comparison.
